# Supplementary material
Source: PubMed Central journal article supplement (PMC5814392)
Supplement: NIHMS938694-supplement-Suppl_Information.pdf [file NIHMS938694-supplement-Suppl_Information.pdf]

Supplementary Information S1 | **Frequency of *DNMT3A* mutations in hematologic disorders and their associated clinical phenotypes.**

| Disease    | Patient population                                       | Frequency (%)    | Associated Clinical Characteristics                                                | Ref |
|------------|----------------------------------------------------------|------------------|------------------------------------------------------------------------------------|-----|
| <b>AML</b> | De novo AML                                              | 62/281 (22.1)    | Older age<br>Higher WBC                                                            | 1   |
|            | CN AML                                                   | 44/120<br>(36.7) |                                                                                    |     |
|            | De novo AML                                              | 51/200 (26)      |                                                                                    | 2   |
|            | De novo AML                                              | 70/500 (14)      | Older age<br>Higher WBC<br>Higher BM blast %<br>Higher platelet count<br>FAB M4/M5 | 3   |
|            | CN AML                                                   | 51/223<br>(22.9) |                                                                                    |     |
|            | De novo AML <sup>^</sup>                                 | 75/1185 (6.3)    | Older age<br>Higher WBC<br>Higher BM blast %<br>FAB M4/M5                          | 4   |
|            | De novo AML excluding AML1-ETO, PML-RARa, and CBFβ-MYH11 | 73/605 (12.3)    |                                                                                    |     |
|            | De novo CN AML                                           | 70/194 (36.1)    |                                                                                    | 5   |
|            | Intermediate cytogenetic risk AML                        | 67/226 (29.6)    | Female gender<br>Higher WBC                                                        | 6   |
|            | <60yrs AML (entire cohort)                               | 87/498 (17.8)    | Older age<br>Higher WBC<br>Higher platelet count<br>FAB M4/M5                      | 7   |
|            | De novo                                                  | 81/447<br>(18.1) |                                                                                    |     |
|            | sAML                                                     | 6/51 (11.7)      |                                                                                    |     |
|            | <60yrs de novo AML                                       | 86/398 (23)      |                                                                                    | 8   |
|            | <60yrs AML (entire cohort)                               | 102/442 (23.1)   | Older age<br>Higher WBC<br>Higher platelet count                                   | 9   |
| De novo    | 96/415                                                   |                  |                                                                                    |     |

|                            |                                                                  |                                                                                        |    |
|----------------------------|------------------------------------------------------------------|----------------------------------------------------------------------------------------|----|
|                            | (23.1)                                                           |                                                                                        |    |
| CN AML                     | 72/194(37)                                                       |                                                                                        |    |
| sAML                       | 4/16 (25)                                                        |                                                                                        |    |
| tAML                       | 2/11 (18)                                                        |                                                                                        |    |
| <60yrs AML (entire cohort) | 370/1770 (20.9)                                                  | Older age<br>Higher WBC<br>Higher BM blast %<br>Higher platelet count<br>Female gender | 10 |
| De novo AML                | 344/1243 (27.6)                                                  |                                                                                        |    |
| CN AML                     | 268/794 (33.7)                                                   |                                                                                        |    |
| sAML                       | 13/74 (17.6)                                                     |                                                                                        |    |
| tAML                       | 12/104 (11.5)                                                    |                                                                                        |    |
| <60yrs CN AML              | 36/123 (29)                                                      | FAB M4/M5                                                                              | 11 |
| <60yrs CN AML              | 64/181 (35.5)                                                    | Higher WBC<br>Higher BM blast %<br>FAB M4/M5                                           | 12 |
| ≥60yrs CN AML              | 77/234 (33.3)                                                    |                                                                                        |    |
| AML FAB M1-M5              | 32/355 (9)                                                       | Older age<br>Higher WBC<br>FAB M4/M5                                                   | 13 |
| FAB M1                     | 0/6                                                              |                                                                                        |    |
| FAB M2                     | 0/77                                                             |                                                                                        |    |
| FAB M3                     | 0/94                                                             |                                                                                        |    |
| FAB M4                     | 9/66 (13.6)                                                      |                                                                                        |    |
| FAB M5                     | 23/112 (20.5)                                                    |                                                                                        |    |
| sAML                       | 13/37 (35)<br>10/27 (37)<br>from MDS<br>3/10 (33)<br>from<br>MPN |                                                                                        | 14 |
| tAML                       | 10/59 (17)                                                       |                                                                                        |    |
| Pediatric AML              | 0/180 (0)                                                        |                                                                                        | 15 |
| Pediatric AML              | 3/140 (2.1)                                                      |                                                                                        | 16 |
| Pediatric AML              | 2/206 (1)                                                        |                                                                                        | 17 |
| Pediatric AML              | 0/135                                                            |                                                                                        | 18 |
| <b>MDS</b>                 |                                                                  |                                                                                        |    |
| De novo MDS                | 12/150 (8)                                                       | Older age                                                                              | 19 |
| De novo MDS                | 47/479 (9.8)                                                     | Older Age<br>Higher platelet count                                                     | 20 |

|                       |                                      | Lower LDH      |                         |    |
|-----------------------|--------------------------------------|----------------|-------------------------|----|
|                       | De novo MDS                          | 26/221 (11.7)  | 21                      |    |
|                       | De novo MDS                          | 15/115 (13)    | 5                       |    |
|                       | De novo MDS                          | 127/944 (13.5) | 22                      |    |
|                       | De novo MDS                          | 5/193 (2.6)    | 23                      |    |
|                       | IPSS low and intermediate 1 risk MDS | 36/288 (13)    | 24                      |    |
|                       | Pediatric MDS, tMDS                  | 0/44**         | 25                      |    |
| <b>MPN</b>            | MPN (entire cohort)                  | 10/155 (9)     | 26                      |    |
|                       | PMF                                  | 1/16 (6)       |                         |    |
|                       | PV                                   | 2/30 (7)       |                         |    |
|                       | ET                                   | 0/30 (0)       |                         |    |
|                       | Post MPN MF                          | 2/4 (50)       |                         |    |
|                       | Blast phase MPN                      | 5/35 (14)      |                         |    |
|                       | MPN (entire cohort)                  | 3/149 (2)      | 27                      |    |
|                       | PV                                   | 1/30 (3.3)     |                         |    |
|                       | ET                                   | 0/53 (0)       |                         |    |
|                       | PMF                                  | 1/44 (2.3)     |                         |    |
|                       | Blast phase MPN                      | 1/14 (7.1)     |                         |    |
|                       | Blast phase PMF                      | 1/4 (25)       |                         |    |
|                       | MPN (entire cohort)                  | 3/94 (3.2)     | 28                      |    |
|                       | PMF                                  | 3/46 (7)       |                         |    |
|                       | Post MPN MF                          | 0/22 (0)       |                         |    |
|                       | Blast phase MPN                      | 0/11 (0)       |                         |    |
|                       | PMF                                  | 28/483 (5.7)   | 29                      |    |
|                       | PMF (entire cohort)                  | 3/64 (4.7)     | Older age<br>Higher WBC | 30 |
|                       | PMF                                  | 2/37 (5.4)     |                         |    |
|                       | Post MPN MF                          | 1/27 (3.7)     |                         |    |
|                       | Post PV MF                           | 1/13 (7.7)     |                         |    |
|                       | Post ET MF                           | 0/14 (0)       |                         |    |
|                       | Blast phase MF                       | 1/10 (10)      |                         |    |
| PV and ET             | 9/71 (12.6)                          | 31             |                         |    |
| Systemic Mastocytosis | 3/26 (12)                            | 32             |                         |    |
| CML                   | 0/79                                 | 33             |                         |    |
| Blast crisis CML      | 0/81                                 | 34             |                         |    |
| <b>CMML/JMML</b>      | CMML                                 | 0/15 (0)       | 28                      |    |
|                       | CMML-1                               | 1/48 (2)       | 35 36                   |    |
|                       | CMML-2                               | 1/16 (6.3)     |                         |    |
|                       | sAML from CMML                       | 6/23 (26)      |                         |    |
|                       | JMML                                 | 0/49           |                         |    |
|                       | CMML                                 | 5/227 (2)**    | 37                      |    |
|                       | CMML                                 | 7/103 (6.8)    | 5                       |    |
|                       | JMML                                 | 1/113 (0.8)    | 38                      |    |

|                                       |                                           |              |                        |    |    |
|---------------------------------------|-------------------------------------------|--------------|------------------------|----|----|
| <b>T cell leukemia/lymphoma</b>       | T cell lymphoma                           | 11/96 (11)   |                        | 39 |    |
|                                       | PTCL                                      | 21/79 (26.6) |                        | 40 |    |
|                                       | PTCL-NOS                                  | 9/33 (27.3)  |                        |    |    |
|                                       | AITL                                      | 12/46 (26.1) |                        |    |    |
|                                       | PTCL                                      | 10/53 (18.9) |                        | 41 |    |
|                                       | PTCL-NOS                                  | 2/17 (11.8)  |                        |    |    |
|                                       | AITL                                      | 7/30 (23.3)  |                        |    |    |
|                                       | ALCL ALK+                                 | 0/4          |                        |    |    |
|                                       | ALCL ALK-                                 | 1/2          |                        |    |    |
|                                       | Angioimmunoblastic T cell lymphoma (AITL) | 28/85 (33.3) | Older age              |    | 42 |
|                                       | Adult T cell ALL (entire cohort)          | 16/83 (18)   | Older age<br>Lower Hgb |    | 43 |
|                                       | Early T cell (Pro- and Pre-T cell ALL)    | 10/38 (26.3) |                        |    |    |
|                                       | Cortical T cell ALL                       | 5/39 (12.8)  |                        |    |    |
|                                       | Mature T cell ALL                         | 0/3 (0)      |                        |    |    |
|                                       | Adult T cell ALL                          | 17/99 (17)   | Older age<br>Lower Hgb |    | 5  |
|                                       | Adult Early T cell Precursor ALL (ETP)    | 11/68 (16)   | Older age              |    | 44 |
|                                       | Adult T cell ALL (entire cohort)          | 4/53 (7.5)   |                        |    | 45 |
|                                       | Early immature T cell ALL <sup>§</sup>    | 4/28 (14)    |                        |    |    |
|                                       | Cortical T cell ALL <sup>§</sup>          | 0/25 (0)     |                        |    |    |
|                                       | Adult T cell ALL (entire cohort)          | 2/11 (18)    |                        |    | 46 |
| ETP/Pro-/Pre-T cell ALL               | 2/7 (28.5)                                |              |                        |    |    |
| Cortical/Medullary T cell ALL         | 0/4                                       |              |                        |    |    |
| Pediatric T cell ALL                  | 0/91                                      |              |                        | 18 |    |
| Pediatric ETP ALL                     | 0/12                                      |              |                        | 47 |    |
| <b>Mixed phenotype acute leukemia</b> | Adult T/myeloid MPAL                      | 10/18 (55.6) |                        | 48 |    |
|                                       | Pediatric mixed lineage leukemia          | 0/20 (0)     |                        | 18 |    |

Cohorts smaller than 100 patients were excluded. The range of frequencies reported within a given disease type depends on the subset of patients examined as well as whether the entire *DNMT3A* gene or just the hotspots were examined. (A portion of these studies are also presented in Table 1 of the print version).

<sup>^</sup> Higher than expected rate of acute promyelocytic leukemia patients in entire cohort

<sup>\*\*</sup> Only sequenced exon 23

<sup>§</sup> defined by gene expression signature

## REFERENCES

1. Ley, T.J. et al. DNMT3A mutations in acute myeloid leukemia. *N Engl J Med* **363**, 2424-33 (2010).
2. Cancer Genome Atlas Research, N. Genomic and epigenomic landscapes of adult de novo acute myeloid leukemia. *N Engl J Med* **368**, 2059-74 (2013).
3. Hou, H.A. et al. DNMT3A mutations in acute myeloid leukemia-stability during disease evolution and the clinical implication. *Blood* (2011).
4. Shen, Y. et al. Gene mutation patterns and their prognostic impact in a cohort of 1,185 patients with acute myeloid leukemia. *Blood* (2011).
5. Roller, A. et al. Landmark analysis of DNMT3A mutations in hematological malignancies. *Leukemia* **27**, 1573-8 (2013).
6. Markova, J. et al. Prognostic impact of DNMT3A mutations in patients with intermediate cytogenetic risk profile acute myeloid leukemia. *Eur J Haematol* **88**, 128-35 (2012).
7. Thol, F. et al. Incidence and prognostic influence of DNMT3A mutations in acute myeloid leukemia. *J Clin Oncol* **29**, 2889-96 (2011).
8. Patel, J.P. et al. Prognostic relevance of integrated genetic profiling in acute myeloid leukemia. *N Engl J Med* **366**, 1079-89 (2012).
9. Ribeiro, A.F.T. et al. Mutant DNMT3A: a new marker of poor prognosis in acute myeloid leukemia. *Blood* **119**, 5824-5831 (2012).
10. Gaidzik, V.I. et al. Clinical impact of DNMT3A mutations in younger adult patients with acute myeloid leukemia: results of the AML Study Group (AML5G). *Blood* **121**, 4769-77 (2013).
11. Renneville, A. et al. Prognostic significance of DNA methyltransferase 3A mutations in cytogenetically normal acute myeloid leukemia: a study by the Acute Leukemia French Association. *Leukemia* **26**, 1247-54 (2012).
12. Marcucci, G. et al. Age-related prognostic impact of different types of DNMT3A mutations in adults with primary cytogenetically normal acute myeloid leukemia. *J Clin Oncol* **30**, 742-50 (2012).
13. Yan, X.J. et al. Exome sequencing identifies somatic mutations of DNA methyltransferase gene DNMT3A in acute monocytic leukemia. *Nat Genet* **43**, 309-15 (2011).
14. Fried, I. et al. Frequency, onset and clinical impact of somatic DNMT3A mutations in therapy-related and secondary acute myeloid leukemia. *Haematologica* **97**, 246-50 (2012).
15. Ho, P.A. et al. Leukemic mutations in the methylation-associated genes DNMT3A and IDH2 are rare events in pediatric AML: a report from the Children's Oncology Group. *Pediatr Blood Cancer* **57**, 204-9 (2011).
16. Hollink, I.H.I.M. et al. Low frequency of DNMT3A mutations in pediatric AML, and the identification of the OCI-AML3 cell line as an in vitro model. **26**, 371-373 (2011).
17. Liang, D.C. et al. Cooperating gene mutations in childhood acute myeloid leukemia with special reference on mutations of ASXL1, TET2, IDH1, IDH2, and DNMT3A. *Blood* **121**, 2988-95 (2013).
18. Huether, R. et al. The landscape of somatic mutations in epigenetic regulators across 1,000 paediatric cancer genomes. *Nat Commun* **5**, 3630 (2014).
19. Walter, M.J. et al. Recurrent DNMT3A mutations in patients with myelodysplastic syndromes. *Leukemia* **25**, 1153-8 (2011).
20. Lin, C.C. et al. IDH mutations are closely associated with mutations of DNMT3A, ASXL1 and SRSF2 in patients with myelodysplastic syndromes and are stable during disease evolution. *Am J Hematol* **89**, 137-44 (2014).

21. Damm, F. et al. Mutations affecting mRNA splicing define distinct clinical phenotypes and correlate with patient outcome in myelodysplastic syndromes. *Blood* **119**, 3211-8 (2012).
22. Haferlach, T. et al. Landscape of genetic lesions in 944 patients with myelodysplastic syndromes. *Leukemia* **28**, 241-7 (2014).
23. Thol, F. et al. Rare occurrence of DNMT3A mutations in myelodysplastic syndromes. *Haematologica* (2011).
24. Bejar, R. et al. Validation of a prognostic model and the impact of mutations in patients with lower-risk myelodysplastic syndromes. *J Clin Oncol* **30**, 3376-82 (2012).
25. Shiba, N. et al. DNMT3A mutations are rare in childhood acute myeloid leukaemia, myelodysplastic syndromes and juvenile myelomonocytic leukaemia. *Br J Haematol* **156**, 413-4 (2012).
26. Stegelmann, F. et al. DNMT3A mutations in myeloproliferative neoplasms. *Leukemia* **25**, 1217-9 (2011).
27. Brecqueville, M. et al. Mutation analysis of ASXL1, CBL, DNMT3A, IDH1, IDH2, JAK2, MPL, NF1, SF3B1, SUZ12, and TET2 in myeloproliferative neoplasms. *Genes Chromosomes Cancer* **51**, 743-55 (2012).
28. Abdel-Wahab, O. et al. DNMT3A mutational analysis in primary myelofibrosis, chronic myelomonocytic leukemia and advanced phases of myeloproliferative neoplasms. *Leukemia* **25**, 1219-20 (2011).
29. Vannucchi, A.M. et al. Mutations and prognosis in primary myelofibrosis. *Leukemia* **27**, 1861-9 (2013).
30. Brecqueville, M. et al. Array comparative genomic hybridization and sequencing of 23 genes in 80 patients with myelofibrosis at chronic or acute phase. *Haematologica* **99**, 37-45 (2014).
31. Quintas-Cardama, A. et al. Molecular analysis of patients with polycythemia vera or essential thrombocythemia receiving pegylated interferon alpha-2a. *Blood* **122**, 893-901 (2013).
32. Traina, F. et al. Single nucleotide polymorphism array lesions, TET2, DNMT3A, ASXL1 and CBL mutations are present in systemic mastocytosis. *PLoS One* **7**, e43090 (2012).
33. Lin, J. et al. Recurrent DNMT3A R882 mutations in Chinese patients with acute myeloid leukemia and myelodysplastic syndrome. *PLoS One* **6**, e26906 (2011).
34. Li, X. et al. Absence of DNMT3A gene mutation in chronic myeloid leukemia patients in blast crisis. *Eur J Haematol* **88**, 455-7 (2012).
35. Abu Kar, S. et al. Spliceosomal gene mutations are frequent events in the diverse mutational spectrum of chronic myelomonocytic leukemia but largely absent in juvenile myelomonocytic leukemia. *Haematologica* (2012).
36. Jankowska, A.M. et al. Mutational spectrum analysis of chronic myelomonocytic leukemia includes genes associated with epigenetic regulation: UTX, EZH2, and DNMT3A. *Blood* **118**, 3932-41 (2011).
37. Itzykson, R., Kosmider, O. & Fenaux, P. Somatic mutations and epigenetic abnormalities in myelodysplastic syndromes. *Best Pract Res Clin Haematol* **26**, 355-64 (2013).
38. Wlodarski, M.W. et al. Abnormal promoter DNA methylation in juvenile myelomonocytic leukemia is not caused by mutation in DNMT3A. *Blood* **118**, 4490-1 (2011).
39. Couronne, L., Bastard, C. & Bernard, O.A. TET2 and DNMT3A mutations in human T-cell lymphoma. *N Engl J Med* **366**, 95-6 (2012).
40. Sakata-Yanagimoto, M. et al. Somatic RHOA mutation in angioimmunoblastic T cell lymphoma. *Nat Genet* **46**, 171-5 (2014).
41. Palomero, T. et al. Recurrent mutations in epigenetic regulators, RHOA and FYN kinase in peripheral T cell lymphomas. *Nat Genet* **46**, 166-70 (2014).

42. Odejide, O. et al. A targeted mutational landscape of angioimmunoblastic T-cell lymphoma. *Blood* **123**, 1293-6 (2014).
43. Grossmann, V. et al. The molecular profile of adult T-cell acute lymphoblastic leukemia: mutations in RUNX1 and DNMT3A are associated with poor prognosis in T-ALL. *Genes Chromosomes Cancer* **52**, 410-22 (2013).
44. Neumann, M. et al. Whole-exome sequencing in adult ETP-ALL reveals a high rate of DNMT3A mutations. *Blood* **121**, 4749-52 (2013).
45. Van Vlierberghe, P. et al. Prognostic relevance of integrated genetic profiling in adult T-cell acute lymphoblastic leukemia. *Blood* **122**, 74-82 (2013).
46. Simon, C. et al. A key role for EZH2 and associated genes in mouse and human adult T-cell acute leukemia. *Genes Dev* **26**, 651-6 (2012).
47. Zhang, J. et al. The genetic basis of early T-cell precursor acute lymphoblastic leukaemia. *Nature* **481**, 157-63 (2012).
48. Kern, W. et al. Mixed Phenotype Acute Leukemia, T/Myeloid, NOS (MPAL-TM) Has a High DNMT3A Mutation Frequency and Carries Further Genetic Features of Both AML and T-ALL: Results of a Comprehensive Next-Generation Sequencing Study Analyzing 32 Genes. *Blood* **120**, 403 (2012).
