# Supplementary material
Source: PubMed Central journal article supplement (PMC5814392)
Supplement: NIHMS938694-supplement-Suppl_Table_2.pdf [file NIHMS938694-supplement-Suppl_Table_2.pdf]

Supplementary Information S2 | **Biochemical Impact of Mutations in Dnmt3a found in Cancer Patients**

| Residue (murine) | AA | Disease       | Domain              | Consequence          | Ref  |
|------------------|----|---------------|---------------------|----------------------|------|
| 47 (44)          | K  |               | N-terminal          | G9a/GLP methylation  | 1    |
| 308 (304)        | Q  | AML           | PWWP                | H3                   | 2    |
| 333 (329)        | D  |               | PWWP                | H3K36 (-)            | 3    |
| 337 (333)        | S  |               | PWWP                | chromatin (-)        | 4    |
| 584 (580)        | R  |               | ADD                 | H3                   | 2    |
| 640 (636)        | F  |               | Motif I             | Cat                  | 5    |
| 664 (660)        | E  | AML           | Motif II            | Cat                  | 5    |
| 676 (672)        | D  |               | Motif III           | AdoMet               | 5    |
| 710 (706)        | C  | sAML from MDS | Motif IV            | Cat, DNA, AdoMet (-) | 5    |
| 711 (707)        | S  |               | Motif V             | Cat, AdoMet (-)      | 5    |
| 714 (710)        | C  | AML           | Following motif IV  | AdoMet               | 5    |
| 720 (716)        | N  | T-ALL         | Following motif IV  | Cat, DNA             | 5    |
| 721 (717)        | R  |               | Following motif IV  | Cat                  | 5    |
| 729 (725)        | R  | AML           | Catalytic           | DNA                  | 6    |
| 733 (729)        | E  | AML, CMML     | Catalytic           | DNA                  | 6    |
| 756 (752)        | R  |               | Motif VI            | Cat (-),DNA (+)      | 5    |
| 757 (753)        | K  |               | Motif VI            | Cat                  | 5    |
| 771 (767)        | R  | AML, MDS, SM  | Catalytic           | DNA                  | 6    |
| 792 (788)        | R  | T-ALL         | Motif VIII          | Cat, DNA (+)         | 5    |
| 826 (822)        | K  | MDS           | Catalytic           | DNAMult              | 7    |
| 831 (827)        | R  |               | Variable domain     | DNA                  | 5    |
| 836 (832)        | R  |               | Catalytic, Variable | DNAMult, DNA         | 7, 5 |
| 841 (837)        | K  | AML           | Catalytic           | DNAMult              | 7    |
| 844 (840)        | K  |               | Catalytic           | Coop                 | 7    |
| 845 (841)        | D  |               | Catalytic           | DNA (+)              | 7    |
| 847 (843)        | H  |               | Catalytic           | DNA (+)              | 7    |
| 855 (851)        | K  |               | Catalytic           | Coop                 | 7    |
| 856 (852)        | E  | T-ALL         | Catalytic           | DNA (+)              | 7    |
| 860 (856)        | W  | AML           | Catalytic           | Cat                  | 8    |
| 873 (869)        | H  |               | Catalytic           | Cat                  | 8    |
| 876 (872)        | D  |               | Catalytic           | Cat                  | 8    |
| 879 (875)        | N  | AML           | Catalytic           | Cat                  | 8    |
| 882 (878)        | R  | AML           | In front of motif X | Cat, DNA             | 5    |

|                  |   |                     |                    |              |
|------------------|---|---------------------|--------------------|--------------|
| <b>885 (881)</b> | R | In front of motif X | Cat (-),<br>AdoMet | <sup>5</sup> |
| <b>887 (883)</b> | R | Motif X             | Cat, DNA           | <sup>5</sup> |

Analysis of amino acid residues tested for their DNA binding and/or catalytic activity. The human residue mutated in the indicated diseases, along with the mouse residue in which the functional consequences were tested, are indicated in the second column. A comprehensive summary of the role of additional residues is reported in Table S2. The indicated motifs are all part of the catalytic domain. Cat= reduced catalytic activity, Cat (-) = no catalytic activity; AdoMet= reduced AdoMet binding, AdoMet(-)=no AdoMet binding; DNA=reduced DNA binding; DNA(+)= enhanced DNA binding; DNAMulti= lose ability to multimerize on DNA; H3K36 (-)= lose H3K36 affinity; chromatin (-)= lose chromatin targeting; H3= insensitive to H3 peptide; Coop= lower cooperativity during multimerization; SM=systemic mastocytosis

## REFERENCES

1. Chang, Y. et al. MPP8 mediates the interactions between DNA methyltransferase Dnmt3a and H3K9 methyltransferase GLP/G9a. *Nat Commun* **2**, 533 (2011).
2. Li, B.Z. et al. Histone tails regulate DNA methylation by allosterically activating de novo methyltransferase. *Cell Res* **21**, 1172-81 (2011).
3. Dhayalan, A. et al. The Dnmt3a PWWP domain reads histone 3 lysine 36 trimethylation and guides DNA methylation. *J Biol Chem* **285**, 26114-20 (2010).
4. Ge, Y.Z. et al. Chromatin targeting of de novo DNA methyltransferases by the PWWP domain. *J Biol Chem* **279**, 25447-54 (2004).
5. Gowher, H. et al. Mutational analysis of the catalytic domain of the murine Dnmt3a DNA-(cytosine C5)-methyltransferase. *J Mol Biol* **357**, 928-41 (2006).
6. Holz-Schietinger, C., Matje, D.M., Harrison, M.F. & Reich, N.O. Oligomerization of DNMT3A controls the mechanism of de novo DNA methylation. *J Biol Chem* **286**, 41479-88 (2011).
7. Rajavelu, A., Jurkowska, R.Z., Fritz, J. & Jeltsch, A. Function and disruption of DNA methyltransferase 3a cooperative DNA binding and nucleoprotein filament formation. *Nucleic Acids Res* **40**, 569-80 (2012).
8. Holz-Schietinger, C., Matje, D.M. & Reich, N.O. Mutations in DNA methyltransferase (DNMT3A) observed in acute myeloid leukemia patients disrupt processive methylation. *J Biol Chem* **287**, 30941-51 (2012).
